# Supplementary material
Source: PubMed Central journal article supplement (PMC5198158)
Supplement: Supp_Fig1.pdf [file Supp_Fig1.pdf]

## Supplementary Data

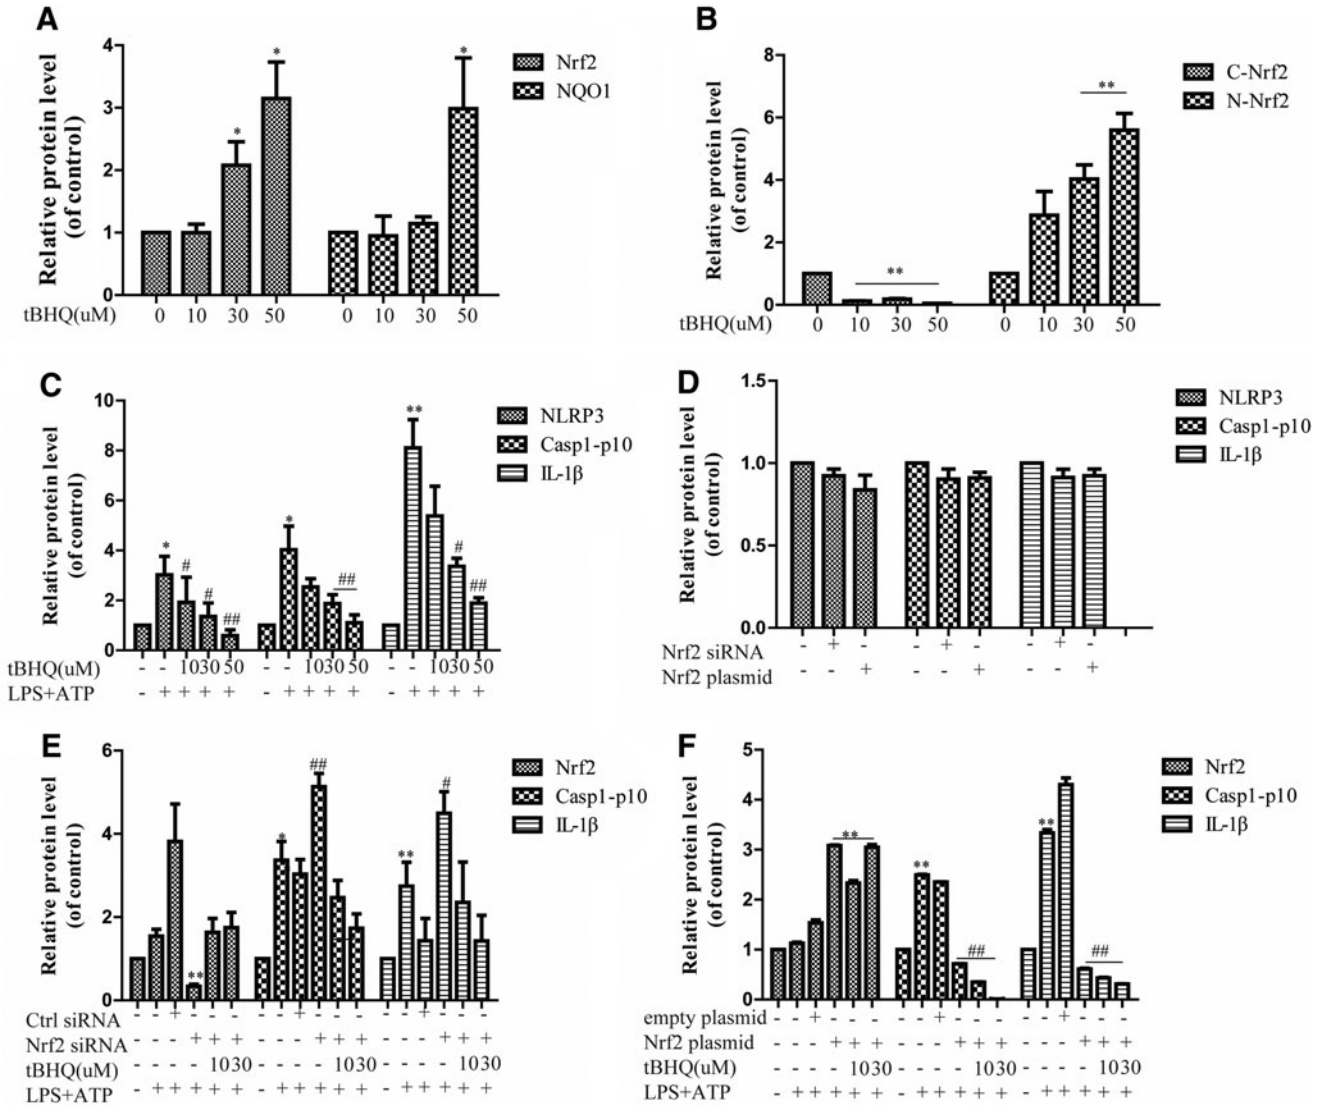

**SUPPLEMENTARY FIG. S1. Nrf2 inhibited NLRP3 inflammasome activation.** The expressions of Nrf2 and NQO1 proteins in Figure 1A were normalized to  $\beta$ -actin (A, B). The expression of NLRP3, cleaved caspase-1, and IL-1 $\beta$  proteins in Figure 1B and G was normalized to  $\beta$ -actin (C, D). NLRP3, cleaved caspase-1, and IL-1 $\beta$  protein levels in Figure 1H and I were normalized to  $\beta$ -actin (E, F). All data are expressed as the mean  $\pm$  SD of three different experiments. \* $p$  < 0.05, \*\* $p$  < 0.01 compared with the control, # $p$  < 0.05, ## $p$  < 0.01 compared with LPS+ATP. ATP, adenosine triphosphate; LPS, lipopolysaccharide; NLRP3, NLR family, pyrin domain containing 3; Nrf2, nuclear factor erythroid 2-related factor 2.
